# Supplementary material for: One pot synthesis of α-AgVO3/palygorskite nanocomposites with enhanced photocatalytic activity using triple roles of palygorskite: supporter, dispersant and growth-directing agent
Source: Royal Society of Chemistry journal article supplement (doi:10.1039/c8dt02636j), 2018-01-01
Supplement: c8dt02636j1.pdf [file c8dt02636j1.pdf]

**One pot synthesis of  $\alpha$ -AgVO<sub>3</sub>/palygorskite nanocomposite with  
enhanced photocatalytic activity using triple roles of  
palygorskite: supportor, dispersant and growth-directing agent**

Yuting Luo<sup>a</sup>, Jie Luo<sup>a</sup>, Yuxiang Hua<sup>a</sup>, Jiacheng Yao<sup>a</sup>, Shen-ming Chen<sup>\*b</sup>, Xiaoheng  
Liu<sup>\*a</sup>

Key Laboratory of Education Ministry for Soft Chemistry and Functional Materials,  
Nanjing University of Science & Technology, Nanjing 210094, China,  
Department of Chemical Engineering and Biotechnology, National Taipei University  
of Technology, No. 1, Section 3, Chung-Hsiao East Road, Taipei 106, Taiwan,  
Republic of China

Corresponding author:

Xiaoheng Liu

Key Laboratory of Education Ministry for Soft Chemistry and Functional Materials,  
Nanjing University of Science and Technology, Nanjing 210094, China

Tel.: +86-25-84315943 Fax: +86-25-84315054

E-mail: xhliu@njust.edu.cn (Xiaoheng Liu)

Shen-ming Chen

Department of Chemical Engineering and Biotechnology, National Taipei University  
of Technology, No. 1, Section 3, Chung-Hsiao East Road, Taipei 106, Taiwan,  
Republic of China

E-mail: smchen@ntut.edu.tw (Shen-ming Chen)

## Supporting Information

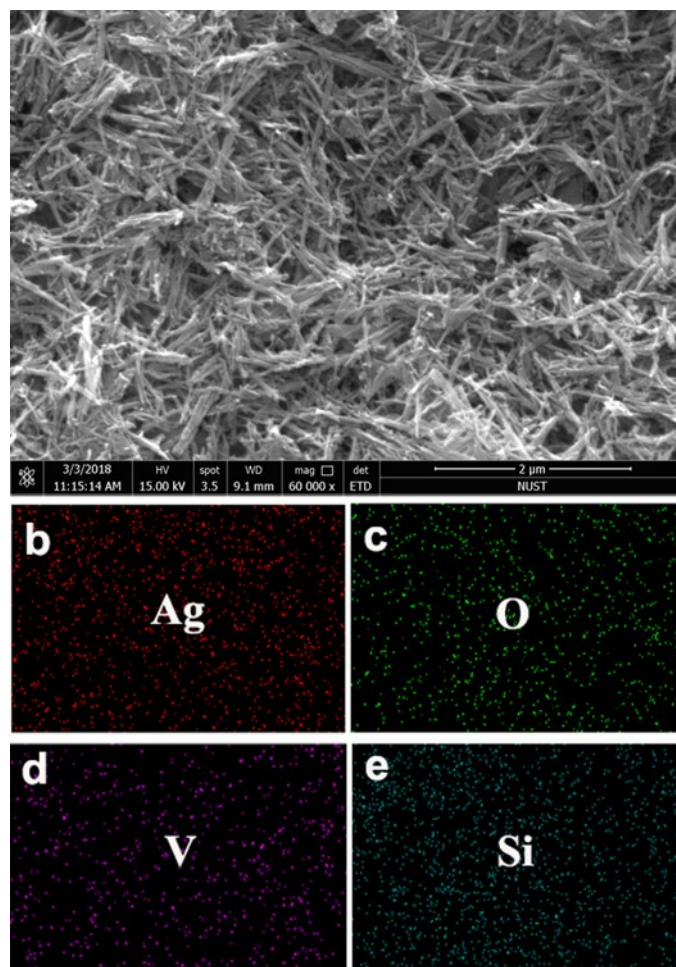

Fig. S1 (a) SEM image of 40%  $\text{AgVO}_3/\text{Pal}$  and corresponding EDS elemental mapping images of (b) Ag, (c) O, (d) V, (e) Si

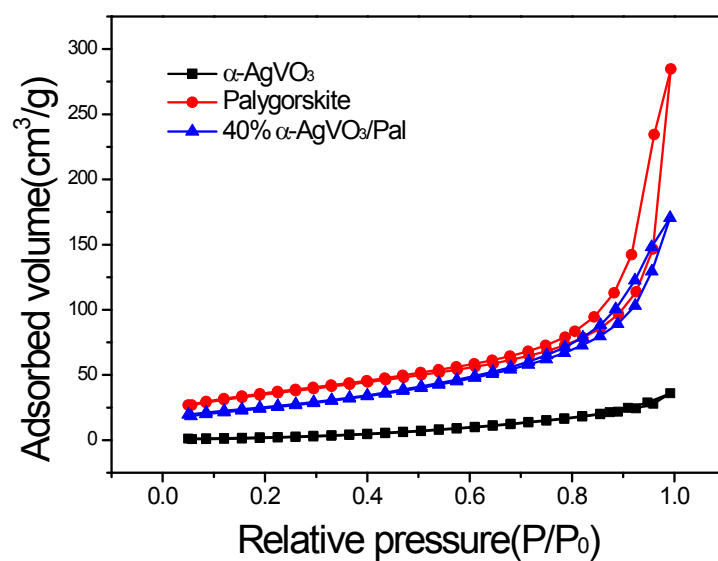

Fig. S2  $\text{N}_2$  adsorption-desorption isotherms of palygorskite,  $\alpha\text{-AgVO}_3$  and 40%  $\text{AgVO}_3/\text{Pal}$

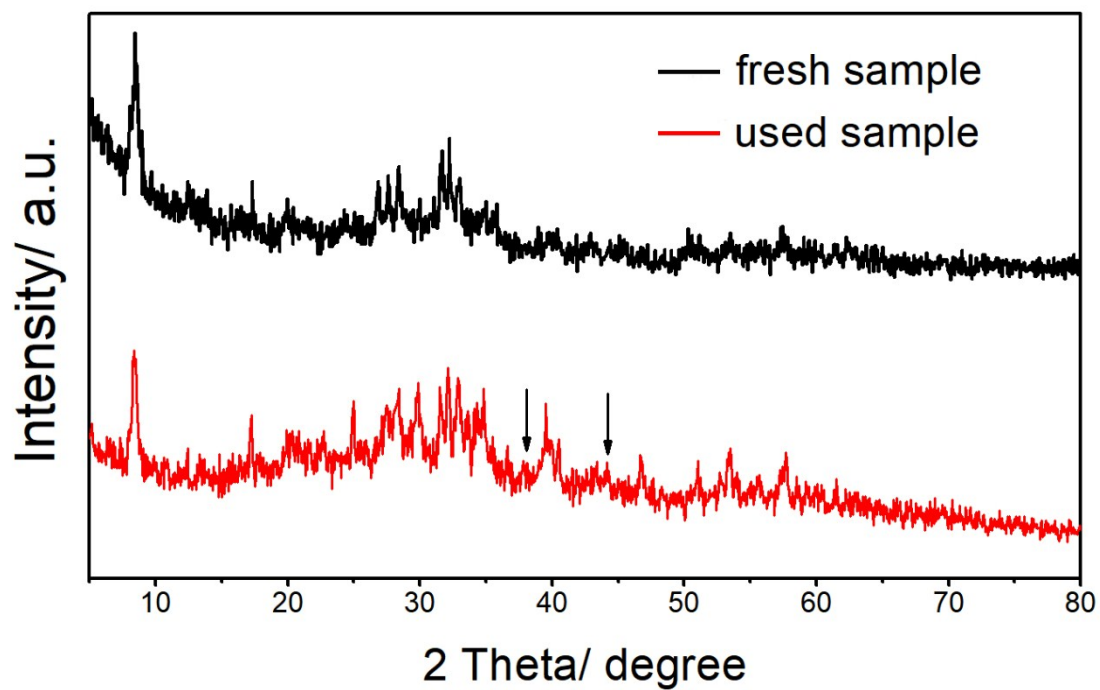

Fig. S3 XRD patterns of 40% AgVO<sub>3</sub>/Pal: fresh sample and after 4 cycling runs
